1 Y.B.A. Wan<sup>1,17</sup>, M.A. Simpson<sup>2,17</sup>, J.A. Aragon-Martin<sup>1</sup>, D.P.S. Osborn<sup>3</sup>, E.  
2 Regalado<sup>4</sup>, D.C. Guo<sup>4</sup>, C. Boileau<sup>5,6,7,8</sup>, G. Jondeau<sup>5,6,7,9</sup>, L. Benarroch<sup>5</sup>, Y.  
3 Isekame<sup>1</sup>, J. Bharj<sup>3</sup>, J. Sneddon<sup>10</sup>, E. Fisher<sup>11</sup>, J. Dean<sup>12</sup>, M.T. Tome  
4 Esteban<sup>1,13</sup>, A. Sagar<sup>14</sup>, D. Milewicz<sup>4</sup>, M. Jahangiri<sup>13,15</sup>, E. R. Behr<sup>1,13</sup>, A.  
5 Smith<sup>16,18</sup> & A. H. Child<sup>1,13,18</sup>.

6  
7 1) Molecular and Clinical Sciences Research Institute, St. George's,  
8 University of London, United Kingdom;  
9 2) Division of Genetics and Molecular Medicine, Kings College London,  
10 United Kingdom;  
11 3) Cell Biology and Genetics Research Centre, St. George's, University of  
12 London, United Kingdom;  
13 4) Department of Internal Medicine, University of Texas, USA;  
14 5) Laboratory of Vascular Translational Science, INSERM, Paris, France;  
15 6) Centre de référence pour le syndrome de Marfan et apparentés, APHP  
16 hopital Bichat, Paris, France;  
17 7) Université Paris Diderot, Paris France;  
18 8) Department de Genetique, APHP, Hopital Bichat Paris, France;  
19 9) Service de Cardiologie, APHP, Hopital Bichat, Paris, France;  
20 10) East Surrey Hospital, Redhill, United Kingdom;  
21 11) The Park Surgery, Albion Way, Horsham, United Kingdom;  
22 12) Clinical Genetics, NHS Grampian, Forester hill, Aberdeen, United  
23 Kingdom;  
24 13) Cardiology Academic Group, Cardiology Department, St George's  
25 Hospital, United Kingdom;  
26 14) Clinical Genetics Unit, St George's, University of London, United  
27 Kingdom;  
28 15) Department of Cardiothoracic Surgery, St. George's Healthcare NHS  
29 Trust, London, United Kingdom;  
30 16) Academic Department of Vascular Surgery, Cardiovascular Division, BHF  
31 Centre of Research Excellence, Kings College London, United Kingdom;  
32 17) These authors contributed equally to this work.  
33 18) These authors contributed equally to this work. Correspondence should  
34 be addressed to A Child ([achild@sgul.ac.uk](mailto:achild@sgul.ac.uk)).  
35  
36  
37

## 38 **A mutation in the *LMOD1* actin-binding domain** 39 **segregating with disease in a large British family with** 40 **thoracic aortic aneurysms and dissections.**

### 41 **Abstract**

43 We describe a mutation in *LMOD1*, which predisposes individuals to thoracic  
44 aortic aneurysms and dissections in a large multi-generation British family.  
45 Exome variant profiles for the proband and two distantly related affected

46 relatives were generated and a rare protein-altering, heterozygous variant  
47 was identified, present in all the exome-sequenced affected individuals. The  
48 allele c.1784T>C, p.(V595A) in *LMOD1* is located in a known actin-binding  
49 WH2 domain and is carried by all living affected individuals in the family.  
50 *LMOD1* was further assessed in a consecutive series of 98 UK TAAD patients  
51 and one further mutation was found, yielding an incidence of ~2% in our study  
52 group. Assessment of *LMOD1* in international TAAD cohorts discovered nine  
53 other missense variants of which three were classed as likely pathogenic.

54 Validation of *LMOD1* was undertaken using a zebrafish animal model. Knock-  
55 down of both *lmod1a* and *lmod1b* paralogs using morpholino oligonucleotides  
56 showed a reproducible abnormal phenotype involving the aortic arches under  
57 off-target controls. Injection of the human *LMOD1* c.1784T>C, p.(V595A)  
58 mutation demonstrated a likely dominant negative effect and illustrated a loss  
59 of function cause.

60 Mutations found in the WH2 actin-binding domain of *LMOD1* may delay actin  
61 polymerization and therefore compromise actin length, dynamics and  
62 interaction with myosin in the smooth muscle contraction pathway.

63

64

## 65 **Introduction**

66

67 TAAD (thoracic aortic aneurysm and dissection) is a severe disease  
68 accounting for approximately 15,000 deaths per year in the USA<sup>1</sup>. TAAD can  
69 be present in genetic syndromes such as Marfan and Loeys-Dietz syndromes  
70 and the vascular form of Ehlers Danlos syndrome. However, most TAAD

71 patients do not satisfy the characteristic syndromes<sup>2</sup>. Approximately a quarter  
72 of non-syndromic forms of TAAD are familial<sup>3</sup>. Within affected kindred the  
73 disorder shows variability in penetrance and severity, notably between males  
74 and females<sup>3-5</sup>. The underlying molecular genetics of this disorder is  
75 heterogeneous, with 36 genes reported to date as sites of pathogenic  
76 mutation in syndromic and non-syndromic TAAD (OMIM). Mutations in  
77 reported genes contribute to the genetic aetiology of approximately 20-30% of  
78 TAAD families<sup>6</sup>, with the most mutations, in approximately 14% of families,  
79 found in *ACTA2*. Investigations into the biological roles of this group of 36  
80 genes<sup>7-37</sup> have revealed some common pathways, including those relating to  
81 TGF- $\beta$  signaling<sup>38</sup> as well as smooth muscle contraction<sup>7</sup>.

82

83 To extend the understanding of the genetic basis of TAAD, a whole exome  
84 sequencing approach was used in a large multigenerational family of British  
85 ancestry (M441) with autosomal dominant inheritance of TAAD. The proband  
86 initially consulted a cardiologist as he had lost both his father and half-brother  
87 to type A dissection involving the ascending aorta. Doppler transthoracic  
88 echocardiography (TTE) measurements revealed he had a mildly dilated  
89 aortic root (4.1cm). Clinical investigation of other family members revealed  
90 five living relatives who had previously undergone surgery for TAAD or who  
91 had a dilated aortic root (figure 1). Physical examination of these subjects  
92 revealed that they shared some phenotypic features. Family history revealed  
93 aortic dissection as the cause of death for four males (mean age of death  
94 52.25 years, range 39-62 years).

95

96

## 97 **Subjects and Methods**

98

### 99 Subjects

100 All individuals in this study were ascertained through the Aortopathy clinic at  
101 St George's University Hospitals Foundation NHS Trust.

102 Ethical consent has been obtained from the National Research Ethics Service  
103 Committee London- Bloomsbury (reference; 14/LO/1770, project ID; 99752).

104 Letter of invitation to participants, participant information sheets, DNA analysis  
105 consent forms and skin biopsy consent forms have all been approved by the  
106 ethical committee. License has been granted for the storage of samples under  
107 section 16 (2) (e) (ii) of the Human Tissue Act 2004 (No. 12335). Patient and  
108 family participants have read and signed the relevant consent forms.

109

### 110 Sequencing

111 We undertook a whole exome sequencing (WES) approach to identify the  
112 causative mutation in this family, generating exome variant profiles for the  
113 proband and two distantly affected relatives (figure 1). It was performed at the  
114 KCL-GSTT BRC Genomics facility at Guys Hospital, London as a  
115 collaborative research service. Exome libraries were generated using Agilent  
116 SureSelect kits on an Agilent Bravo Liquid handling robot and the exome  
117 enriched libraries were sequenced by paired-end reads on an Illumina  
118 HiSeq2000 platform and interpreted using their own in-house pipeline.

119

120

121 Variant Interpretation

122 In-silico prediction tools Polyphen-2<sup>39</sup>, GVG<sup>40</sup>, UMD Predictor<sup>41</sup>, SIFT<sup>42</sup>, and  
123 PROVEAN<sup>43</sup> were used along with the genomic database The Genome  
124 Aggregation Database (gnomAD)<sup>44</sup> to determine pathogenicity of alleles found  
125 upon exome analysis. Functional annotation tools Combined Annotation-  
126 Dependent Depletion (CADD)<sup>45</sup> and PhastCons 100 way<sup>46</sup> were used to  
127 predict if variants were amongst the top 1% of deleterious variants and  
128 estimate the probability that the nucleotide belongs to a conserved element  
129 based on multiple alignment. The Universal Protein Resource (UniProt)<sup>47</sup> and  
130 The Genotype Tissue Expression (GTEx)<sup>48</sup> were used to assess domain  
131 architecture and tissue specific gene expression. Sanger sequencing was  
132 performed to determine cosegregation of candidate genes in the study family  
133 as well as detect further mutations in our consecutive 98 TAAD cohort.

134

135 TAAD gene analysis

136 Exome profiles were screened for disease-causing mutations in all 36 TAAD  
137 associated genes. These genes included *ACTA2* (OMIM: \*102620), *BGN*  
138 (OMIM: \*301870), *COL1A1* (OMIM: \*120150), *COL1A2* (OMIM: \*120160),  
139 *COL3A1* (OMIM: \*120180), *COL4A5* (OMIM: \*303630), *COL5A1* (OMIM:  
140 \*120215), *COL5A2* (OMIM: \*120190), *EFEMP2* (OMIM: \*604633), *ELN*  
141 (OMIM: \*130160), *FBN1* (OMIM: \*134797), *FBN2* (OMIM: \*612570), *FLNA*  
142 (OMIM: \*300017), *FOXE3* (OMIM: \*601094), *SLC2A10* (OMIM: \*606145),  
143 *JAG1* (OMIM: \*601920), *LRP1* (OMIM: \*107770), *MAT2A* (OMIM: \*601468),  
144 *MFAP5* (OMIM: \*601103), *MYH11* (OMIM: \*160745), *MYLK* (OMIM:  
145 \*600922), *NOTCH1* (OMIM: \*190198), *PKD1* (OMIM: \*601313), *PKD2* (OMIM:

146 \*173910), *PLOD1* (OMIM: \*153454), *PRKG1* (OMIM: \*176894), *SKI* (OMIM:  
147 \*164780), *SMAD2* (OMIM: \*601366), *SMAD3* (OMIM: \*603109), *SMAD4*  
148 (OMIM: \*600993), *TGFB2* (OMIM: \*190220), *TGFB3* (OMIM: \*190230),  
149 *TGFBR1* (OMIM: \*190181), *TGFBR2* (OMIM: \*190182), *TGFBR3* (OMIM:  
150 \*600742) and *ULK4* (OMIM: \*617010).

151

152

### 153 Animal studies

154 Ethics Statement Animal maintenance, husbandry, and procedures are defined  
155 and controlled by the Animals (Scientific Procedures) Act 1986. All animal  
156 experimentation has been carried out under licenses granted by the Home  
157 Secretary (PIL No. 70/10999) in compliance with Biological Services  
158 Management Group and the Biological Services Ethical Committee, UCL, London,  
159 UK.

160 Wild type (AB x Tup LF) and Tg(kdrl:GFP) zebrafish were maintained and staged  
161 as previously described by Westerfield et al<sup>49</sup>. Tg(kdrl:GFP) fish were used to  
162 study the development of the aortic arches<sup>50</sup>.

163 Zebrafish (*Danio rerio*) were used to assess the involvement of *LMOD1* as a  
164 potential TAAD-causing gene as this species have proven to be a versatile  
165 vertebrate model to study human genetic disease and have already been  
166 used to demonstrate pathogenicity of human TAAD genes<sup>20; 34</sup>. *LMOD1* in  
167 zebrafish identifies two paralogs, *lmod1a* and *lmod1b*. Gene duplication is a  
168 common feature in zebrafish and these paralogs are the result of a genome  
169 duplication that occurred in teleost fish some 300 million years ago<sup>51</sup>. Whole  
170 mount in-situ hybridization was performed to determine expression of

171 candidate genes. Morpholino oligonucleotides (MO) for splice blocking  
172 *lmod1a* exon1/intron1 (5'-TATCATCATCATCACCTCTGCGCTC-3') and  
173 intron1/exon2 (5'-CCTCCCTACAAACAGACACATTATT-3') and splice  
174 blocking *lmod1b* (5'- ATTTCCATTTCTACCTTTTTGAGC-3') were injected  
175 into 1-2 cell embryos to knock down candidate genes and evaluate the  
176 phenotype of morphants compared to un-injected wild-type control fish using  
177 confocal microscopy at 3-4 days post fertilization (dpf). Fluorescent  
178 microscopy was employed to investigate MO injected fish processed with an  
179 actin-filament phalloidin stain and Dextran dyes, highlighting the vasculature.  
180 To obtain an enhanced resolution at confocal microscopy, *Tg(kdrl:GFP)*<sup>50</sup> fish  
181 were used to highlight the vasculature, in particular the aortic arches of MO  
182 injected fish. A standard control MO (5'-CCTCTTACCTCAGTTACAATTTATA-  
183 3') targeting a splice site of human beta-globin<sup>52</sup> was used to identify toxicity  
184 concentrations. A zebrafish control MO targeting *p53* (5'-  
185 GCGCCATTGCTTTGCAAGAATTG-3') was injected singularly (6ng/ul) as  
186 well as co-injected with *lmod1a/lmod1b* MOs (6ng/ul total, 2ng/ul + 2ng/ul  
187 +2ng/ul) as MOs have been reported to cause off-target activation of p53 and  
188 therefore causing non-specific phenotype in injected fish<sup>53</sup>.  
189 Injection of full length human *LMOD1* mRNA and zebrafish *lmod1a* and  
190 *lmod1b* at 1-cell stage were performed to rescue the phenotype caused by  
191 MO knockdown. Injection of the c.1784T>C mRNA from the study family  
192 mutation at 1-cell stage was performed to assess the phenotype of the  
193 embryos.  
194  
195

196 **Results**

197 Initial analysis of exome variant call format (VCF) files for all 36 reported  
198 TAAD genes showed no pathogenic mutation present in all three affected  
199 individuals. Further analysis revealed three rare (MAF < 0.0001), protein-  
200 altering, heterozygous variants present in the profiles of each of the  
201 sequenced individuals. The three candidate variants located in *LMOD1*,  
202 *SPHKAP* and *ZNF483* were each evaluated for cosegregation with the trait in  
203 the pedigree by Sanger sequencing. Neither the variant in *SPHKAP* nor the  
204 variant in *ZNF483* cosegregated with the disease. However, the c.1784T>C,  
205 p.(V595A) (NM\_012134) allele in *LMOD1* was carried by each of the five  
206 affected living individuals (figure 1) and was also present in the DNA sample  
207 obtained from a deceased affected half-brother of the proband. A further 10  
208 heterozygous individuals were identified in the pedigree who had an  
209 ambiguous phenotype, meaning that none of them had detectable aortic  
210 dilation by transthoracic echo but they presented with two or more minor  
211 features associated with a marfanoid phenotype<sup>54</sup>. Seven of these 10  
212 individuals shared phenotypic features found in the family members who had  
213 previously undergone surgery for TAAD or who had a dilated aortic root. One  
214 heterozygous clinically unaffected individual was found who did not present  
215 with a detectable aneurysm, but this individual, IV:18, aged 28 at the time of  
216 examination, was documented as having only a high arched palate consistent  
217 with the phenotypic presentation in the proband and 10 other heterozygous  
218 individuals. A parametric linkage analysis of the observed segregation of the  
219 *LMOD1* c.1784T>C allele and the affection status, generated a LOD score in  
220 excess of 2.3, p=0.0005. (LOD score 6.7 from an affected-only analysis,



221 dominant model, disease frequency 0.0001, penetrance 0.9). These data  
222 suggested that the allele located in *LMOD1* was likely to be disease-causing  
223 in this family and should therefore be investigated further.

224 The c.1784T>C *LMOD1* variant is located in the third and terminal exon of the  
225 encoded 1839bp transcript (figure 2). The predicted p.(V595A) substitution in  
226 the mature protein product replaces a valine residue that has been highly  
227 conserved throughout evolution. This residue is located in the C-terminal WH2  
228 domain known to be an actin-binding motif. The c.1784T>C allele was not  
229 observed gnomAD and was not seen in ~5,500 exomes sequenced and  
230 processed using the same laboratory protocols and data processing pipeline  
231 as used in the current study. The rarity of this allele suggests that it must have  
232 a role in the pathogenesis of aortic aneurysm in a population of TAAD  
233 patients.

234

235 The possibility that further rare *LMOD1* alleles may explain additional cases of  
236 TAAD was explored using Sanger sequencing of the three *LMOD1* exons and  
237 their associated splice sites in a cohort of 98 (36/98 familial) unrelated British  
238 individuals with TAAD. Sanger sequencing of the three amplicons identified  
239 three of the 98 individuals carrying heterozygous missense alleles in *LMOD1*  
240 and one heterozygous silent allele (table 1 showing only rare missense alleles  
241 and figure 2 showing all variants found). The observation of three missense  
242 alleles in this gene in a total of 196 alleles does not deviate from the expected  
243 rate based on allele counts in the ExAC (Chi Square  $p = 0.49$ ). However, it is  
244 noteworthy that one proband, individual M508.1, carries a heterozygous  
245 c.1631C>A, p.(P544H) (MAF = 0.0004342, rs202184893) allele, which was

246 also predicted to be damaging by all *in-silico* prediction tools used (table 1).  
247 This residue substitution is highly conserved across species and appears  
248 within the proline-rich region found upstream of the WH2 domain of the  
249 protein. This affected female (M508.1) at age 32 had a type A dissection at 36  
250 weeks of pregnancy necessitating emergency caesarean section and aortic  
251 root and valve replacement. Aortic histology revealed cystic medial necrosis  
252 found typically but not specifically in Marfan syndrome patients. Physical  
253 examination revealed individual M508.1 to have a high palate, overcrowded  
254 teeth, wrinkled forehead, and small joint hypermobility similar to features seen  
255 in the proband and affected members of our initial proband's family.  
256 Individual M508.1, a proband from the consecutive TAAD series reported her  
257 maternal grandmother died at age 40 of ruptured dissecting aortic aneurysm,  
258 verified by the death certificate. DNA was obtained from the proband's mother  
259 and Sanger sequencing confirmed the c.1631C>A allele was present,  
260 although at age 55, after two pregnancies, her echocardiogram was reported  
261 to be within normal range. In this family, the proband's mother appears to be  
262 unaffected by aortic disease at present based on echocardiogram  
263 measurements, however is physically inactive due to an unrelated illness  
264 causing an inflammatory neurological condition. This may be a contributing  
265 factor to the variable expressivity seen in this family. The proband's clinically  
266 unaffected sister, whose cardiac evaluation including echocardiogram is  
267 normal, does not carry the mutation. Clinical evaluation suggests similarity in  
268 phenotypic presentation of affected individuals in both UK families.  
269 The phenotypic presentation seen in affected individuals in both families  
270 M441 and M508 are generally 'soft signs' also seen in normal control

271 populations. Arm span greater than height, high arched palate, blue sclerae,  
272 down-slanting palpebral fissures, wrinkled forehead, small joint hypermobility  
273 and hyperextensible skin were recorded and compared with the same findings  
274 in all our TAAD probands. Only the presence of small joint hypermobility was  
275 found to be significantly higher in family M441 and proband M508.1 compared  
276 to our TAAD proband cohort ( $p=0.0000003$ ).

277

278 Comparison of our TAAD study family with our cohort of 98 consecutive TAAD  
279 probands (table 2), reveals that only blue sclerae and small joint hypermobility  
280 appear significantly more often in the M441 family. These clinical features  
281 were not assessed in international cohorts as they were not recorded upon  
282 physical examination.

283 The incidence of mutations in *LMOD1* was also evaluated in international  
284 familial TAAD cohorts; GenTac Research Consortium (800 TAAD families)  
285 and Paris Marfan Syndrome Study Group (225 families and 178 isolated  
286 cases), which revealed further variants in this gene (Table 1). Nine rare  
287 missense variants were detected in 12 familial probands of the GenTac  
288 Research Consortium and two rare missense variants were identified in the  
289 Paris Marfan Study Group. All heterozygous alleles were found spanning  
290 across all three exons of the gene. Variants from all three cohorts were  
291 evaluated as likely pathogenic if they were scored in the top 1% of most  
292 deleterious substitutions, high conservation and damaging in 2 or more in-  
293 silico tools (table 1, highlighted in grey).

294 Further investigations through the use of *in-vivo* models were performed to  
295 show that a non-functional *LMOD1* is associated with TAAD in the zebrafish

296 animal model. Conservation of the human LMOD1 (P29536) WH2 domain at  
297 residues 574-600 results in 62.5% shared identity to the predicted zebrafish  
298 *lmod1a* (F1Q5S5) and 84.6% to zebrafish *lmod1b* (E7F062) and conservation  
299 of the proline-rich region at residues 509-544 results in 51.2% and 56.8%  
300 shared identity with *lmod1a* and *lmod1b*, respectively.

301 These data suggest that zebrafish *lmod1b* is more closely related to human  
302 LMOD1 and thus offers the better gene to study, however both paralogs are  
303 likely to be expressed and have overlapping functions, therefore functional  
304 redundancy is likely to exist.

305 *In-situ* hybridization revealed strong expression of both *lmod1a* and *lmod1b* in  
306 the heart, fin buds and as well as expression from the telencephalon to the  
307 tegmentum of the zebrafish. To determine the functional involvement of these  
308 genes during development, antisense Morpholino oligonucleotides (MO) were  
309 employed that block gene-specific translation or mRNA processing. Gene  
310 knockdown was assessed by co-injection of two non-overlapping splice-  
311 directed MOs in *lmod1a*, and one splice-directed MO in *lmod1b*. The zebrafish  
312 embryos were classified as normal if the phenotype was indistinguishable  
313 from wild-type un-injected embryos, moderately affected if they had  
314 pericardial oedema and tail curvature, and severely affected if widespread  
315 oedema was seen with severe tail curvature (figure 3A). This classification  
316 was confirmed independently by two trained observers. Additional phenotypic  
317 features observed in the injected morphants included smaller eyes and body  
318 size, abnormal distribution of melanocytes compared to wild type un-injected  
319 controls (figure 3A).

320 Initially, injection of one splice-directed *lmod1a* MO at a 4ng concentration  
321 generated a 67% combined moderate/severe affected rate and this increased  
322 to 93% when only *lmod1b* MO was injected at the same concentration. Two  
323 splice-directed MO (*lmod1a* and *lmod1b*) were co-injected at 4ng (2ng *lmod1a*  
324 and 2ng *lmod1b*) as a final concentration giving higher percentage of affected  
325 embryos (97%), as well as a higher survival rate (figure 4). This may suggest  
326 that as both *lmod1a* and *lmod1b* are expressed in zebrafish, when one is  
327 knocked-down, the other may have a compensatory effect. Therefore,  
328 knocking-down both paralogs more closely resemble the human deficient  
329 *LMOD1*. A human beta-globin standard control was used and injected at a  
330 4ng concentration and the resulting fish revealed no increase in abnormal  
331 phenotype associated with toxicity compared with un-injected controls. *p53*  
332 MO was injected as an apoptosis management control at 6ng concentration  
333 and the fish did not present with any abnormal phenotype. A co-injection of  
334 *lmod1a/lmod1b/p53* MO at a final concentration of 6ng revealed no reduction  
335 in severity of the phenotype observed compared to *lmod1a/lmo1b* only co-  
336 injection. Therefore, the data presented suggests that the phenotype  
337 observed was unlikely due to off-target effects.

338 Fifty out of sixty-six *lmod1a/lmod1b* MO injected embryos analysed (76%)  
339 demonstrated pooling of blood in the yolk sac by 4 days post fertilization (dpf)  
340 and as a consequence developed significant oedema in their yolk sac by 5dpf.

341 Injection of the full-length human wild-type *LMOD1* mRNA at 60ng/ul into 1-  
342 cell embryos did not give an overexpression phenotype and demonstrated a  
343 similar effect (7% affected) as in the standard control MO and un-injected

344 control experiments indication no toxic effects at that concentration were  
345 causing a phenotype (figure 4).

346 Only the full-length mRNA of the human c.1784T>C mutation (60ng/ul  
347 concentration) was injected into the 1-cell embryos, which resulted in  
348 embryonic death in 141/174 (81%) of cases, with the remaining 32/33  
349 zebrafish demonstrating oedema, tail curvature, abnormal distribution of  
350 melanocytes, smaller eyes and body size as seen in the MO injected  
351 moderate to severe phenotype.

352 Next a full length wild-type human *LMOD1* mRNA was injected at 1-cell stage  
353 followed by *Imod1a/Imod1b* MO (4ng/ul) and the resulting phenotype from MO  
354 knock down could not be rescued at 60ng/ul dosage or even with an  
355 increased dosage up to 200ng/ul, as most were still affected (figure 4). Wild-  
356 type zebrafish *Imod1a* and *Imod1b* were also injected singularly and  
357 combined with MO but also did not show significant rescue of the phenotype.  
358 This suggested that *LMOD1* mRNA may be required at specific time point  
359 which is not possible with zebrafish injections because these are injected at  
360 the 1-cell stage.

361 An F-actin (Phalloidin) marker was used to determine if knockdown of  
362 *Imod1a/Imod1b* in zebrafish had any effect on the actin filament production in  
363 the vasculature as well as the aortic arches at 4dpf (figure 3B). Crossing-over  
364 of muscle fibres through adjacent somites was also identified and  
365 disturbance/loss of the ventral pharyngeal arches was observed in the  
366 morphant fish compared to controls suggesting that *Imod1a* may be required  
367 for aortic arch development or F-actin stabilisation.

368 Next a high molecular weight (500kDa) fluorescein-conjugated Dextran dye  
369 was used to highlight the vasculature of the *Imod1a/Imod1b* injected  
370 morphants to assess for perturbations as observed in the study family.  
371 Fluorescent microscopy showed abnormal branching of the aortic arches and  
372 intermittent flow through the vessels and absent flow towards the caudal half  
373 of the trunk, including fin vasculature (figure 3C). This suggested that *Imod1a*  
374 might play a role in vascular development and maintenance.

375 Transgenic fish were used to further describe the abnormalities observed in  
376 the aortic arches by injection of *Imod1a/Imod1b* MO into *Tg(kdrl:GFP)* fish and  
377 found that MO injected fish showed minimal branching of the aortic arches  
378 compared to that of the un-injected control (figure 3D). These arches are  
379 evolutionary important because in fish, they later become the vasculature of  
380 the gills, but in humans they elaborate more extensively to carry blood to the  
381 lungs and form the carotid arteries, subclavian arteries, aorta and other  
382 associated structures in the upper mediastinum and proximal upper limb and  
383 neck. Importantly, the resulting phenotype seen in all affected fish from  
384 *Imod1a* and *Imod1b* MO as well as the mRNA of the human c.1784T>C  
385 mutation injections were seen consistently through repeat injections and  
386 toxicity controls indicate that the phenotype recorded was the result of a non-  
387 functioning protein rather than off-target toxic effects.

388

389 **Discussion**

390 Leiomodlin-1 (LMOD1) is a 64-kDa actin-binding protein and a homolog of the  
391 only known tropomyosin-coated pointed-end capping tropomodulin protein  
392 (TMOD) family<sup>55</sup>. Vertebrate Lmods consist of 3 isoforms; *LMOD1* (smooth  
393 muscle), *LMOD2* (cardiac muscle) and *LMOD3* (skeletal muscle). LMOD1, is  
394 expressed predominantly in human arteries (tibial, aorta and coronary),  
395 oesophagus, colon, bladder and uterus (GTEx Analysis Release V6 (dbGaP  
396 Accession phs000424.v6.p1)<sup>56</sup>.

397 No mutations in *LMOD2* have been reported yet but the *Lmod2* knockout  
398 mouse exhibits shortened cardiac actin filaments and dilated  
399 cardiomyopathy<sup>57</sup>. Mutations in the human *LMOD3* are reported to cause thin  
400 filament disorganization and nemaline myopathy<sup>58</sup> associated with the rod-like  
401 nemaline bodies reported to cause muscle weakness. The *Lmod3*-null mouse  
402 showed skeletal muscle weakness associated with nemaline bodies<sup>59; 60</sup>.

403 An autosomal recessive mutation causing a premature terminating codon in  
404 exon 2 of *LMOD1* was recently described as causing a fatal rare condition,  
405 megacystis microcolon intestinal hypoperistalsis syndrome (MMIHS) in a  
406 newborn child<sup>61</sup>. Knock-down of human LMOD1 in intestinal smooth muscle  
407 cells showed decrease in actin filament formation and contractility.

408 Phalloidin staining showed consistently a lower concentration of actin  
409 filaments in the *Lmod1*-null bladder tissue and electron microscopy revealed a  
410 presence of rod-like structures in the smooth muscle, similarly found in the  
411 *Lmod3*-null mouse. The authors also reported attenuation in the transitional  
412 epithelium of the bladder and stomach in the *Lmod1*-null mouse but not in the  
413 intestine and suggested that it may be due to decreased mechanical stress.



414 The data demonstrated that *LMOD1* has significant importance in regulating  
415 smooth muscle cytoskeletal-contraction coupling. In contrast to TMODs,  
416 leiomodins also harbor a C-terminal extension and in all three isoforms  
417 this consists of a proline-rich region followed by a WH2 domain<sup>62</sup>. Recent  
418 studies have shown that constructs of *Lmod1* lacking this C-terminal,  
419 containing proline-rich region and WH2 domain, caused a delay in actin  
420 polymerization and increased dependence of *LMOD1* concentration relative to  
421 the polymerization rate<sup>63</sup>.

422 Many of the proteins known to regulate actin dynamics contain a WH2  
423 domain, such as the  $\beta$ -thymosin<sup>64</sup> family of proteins, and WASP proteins bind  
424 the actin nucleating protein complex Arp2/3<sup>65</sup>.

425 These data above suggest that the mutations found in the C-terminal  
426 extension containing the actin-binding domain (WH2) of *LMOD1* may delay  
427 actin polymerization and therefore compromise the length and dynamics of  
428 actin filaments.

429 The non-synonymous *LMOD1* variant [c.1784T>C/p.(V595A)] found in family  
430 M441 changes the amino acid at the WH2 domain at residues 575-600<sup>63</sup> of  
431 the protein. The mutant residue is smaller than the wild-type residue, which  
432 may lead to loss of interactions with other molecules<sup>66</sup>. Changes in the  
433 structure of the WH2 domain may be interfering with binding and assembly of  
434 actin filaments and therefore disrupting the actin dynamics and interaction  
435 with myosin in the smooth muscle cell contraction pathway. Delayed actin  
436 polymerization by abnormal *LMOD1* seen in other studies<sup>63</sup> may lead to

437 earlier capping of the pointed actin filaments by tropomodulin, resulting in  
438 shorter actin filaments.

439 The *LMOD1* c.1631C>A, p.(P544H) allele found in the proline-rich region is  
440 predicted to bind profilin, which is thought to be involved in actin dynamics,  
441 namely actin polymerization<sup>67</sup>. The mutant residue is larger than the wild-type,  
442 which may lead to disturbances in multimeric interactions<sup>66</sup> and the  
443 hydrophobic interactions in the core or surface of the protein may become  
444 lost. Protein structure stability prediction tools forecast a decreased stability of  
445 the protein structure in both c.1631C>A [p.(P544H)] and c.1784T>C  
446 [p.(V595A)] alleles<sup>68</sup>.

447 Therefore as proline-rich regions have been reported to be contributing to  
448 actin binding alongside the WH2 domain<sup>69</sup>, mutations in this polyproline  
449 domain may account for a TAAD phenotype as seen in the second proband,  
450 individual M508.1.

451 The incidence of *LMOD1* disease-related mutations in our UK study is ~2%  
452 (2/99) and the phenotypic presentation of this gene may be of late onset, as  
453 observed by the mean age of dissection in males (50.4 years, range 39-58  
454 years) and variable expression of this dominant gene between carrier males  
455 and females in our study family. Of 18 adults over the age of 18 (7M:11F)  
456 carrying the c.1784T>C allele, those six with demonstrated aneurysm were  
457 predominantly male (5M:1F). Three further variants in our international  
458 cohorts (two in USA cohort and one in French cohort) were classed as likely  
459 pathogenic and further segregation studies and animal modelling are needed  
460 to confirm these.

461 Injection of the human mutant mRNA from the proband of the study family into  
462 zebrafish embryos may demonstrate either a dominant negative effect or  
463 haploinsufficient state. The human mutation illustrates a 'loss of function' as  
464 the resulting phenotype is similar to that observed in *lmod1a/lmod1b* 'knock  
465 down' in zebrafish.

466 The likely dominant negative phenotype suggested by the animal studies  
467 indicates a loss of function mutation carried by our study family. The mutation  
468 is likely to cause a delay in the nucleation of actin monomers to actin  
469 filaments because of a non-functioning WH2 domain, resulting in decreased  
470 actin filaments<sup>61</sup>. Therefore, the crosslinking assembly of actin filaments may  
471 be impaired as abnormal distributions and lower concentrations of phalloidin  
472 staining have been observed by us and *Halim et al*<sup>61</sup>, which may  
473 consequently be leading to aortic cystic medial necrosis and permitting  
474 dilatation and dissection in the affected individuals of our study family.

475 The abnormal branching of the aortic arches observed in the *Tg(kdrl:GFP)*  
476 zebrafish may become an aneurysm specific gene phenotype as it has now  
477 been reported in a third TAAD gene following the *MAT2A*<sup>20</sup> and *FOXE3*<sup>34</sup>  
478 reports.

479

## 480 **Conclusion**

481 In summary, we have shown that mutations in the C-terminal end of *LMOD1*  
482 may underlie TAAD with an incidence of ~2% in our cohort. Additional  
483 mammalian *in-vivo* knock-down studies may help to further confirm a role of  
484 *LMOD1* in actin dynamics of the aorta. Histopathology will be required to  
485 explore the pathological effects (such as demonstration of cystic medial

486 necrosis) of these mutations on the vascular smooth muscle wall in TAAD. An  
487 associated phenotype may be established, when more families and  
488 individuals with pathogenic alleles have been found. This could include blue  
489 sclerae and small joint hypermobility, features that were seen significantly  
490 more frequently in the c.1784T>C carriers than in the 98 other TAAD  
491 probands.

492 *LMOD1* should be investigated in TAAD exome profiles already available  
493 internationally and it may be useful to add this small three-exon gene to future  
494 TAAD panels.

495 Sequencing of other TAAD cohorts will determine a worldwide incidence. In  
496 addition, screening other genes in this important actin-myosin pathway may  
497 highlight other TAAD candidate genes. This should lead to more specific  
498 collaborative therapeutic trials once enough affected *LMOD1* deficient  
499 patients have been identified internationally.

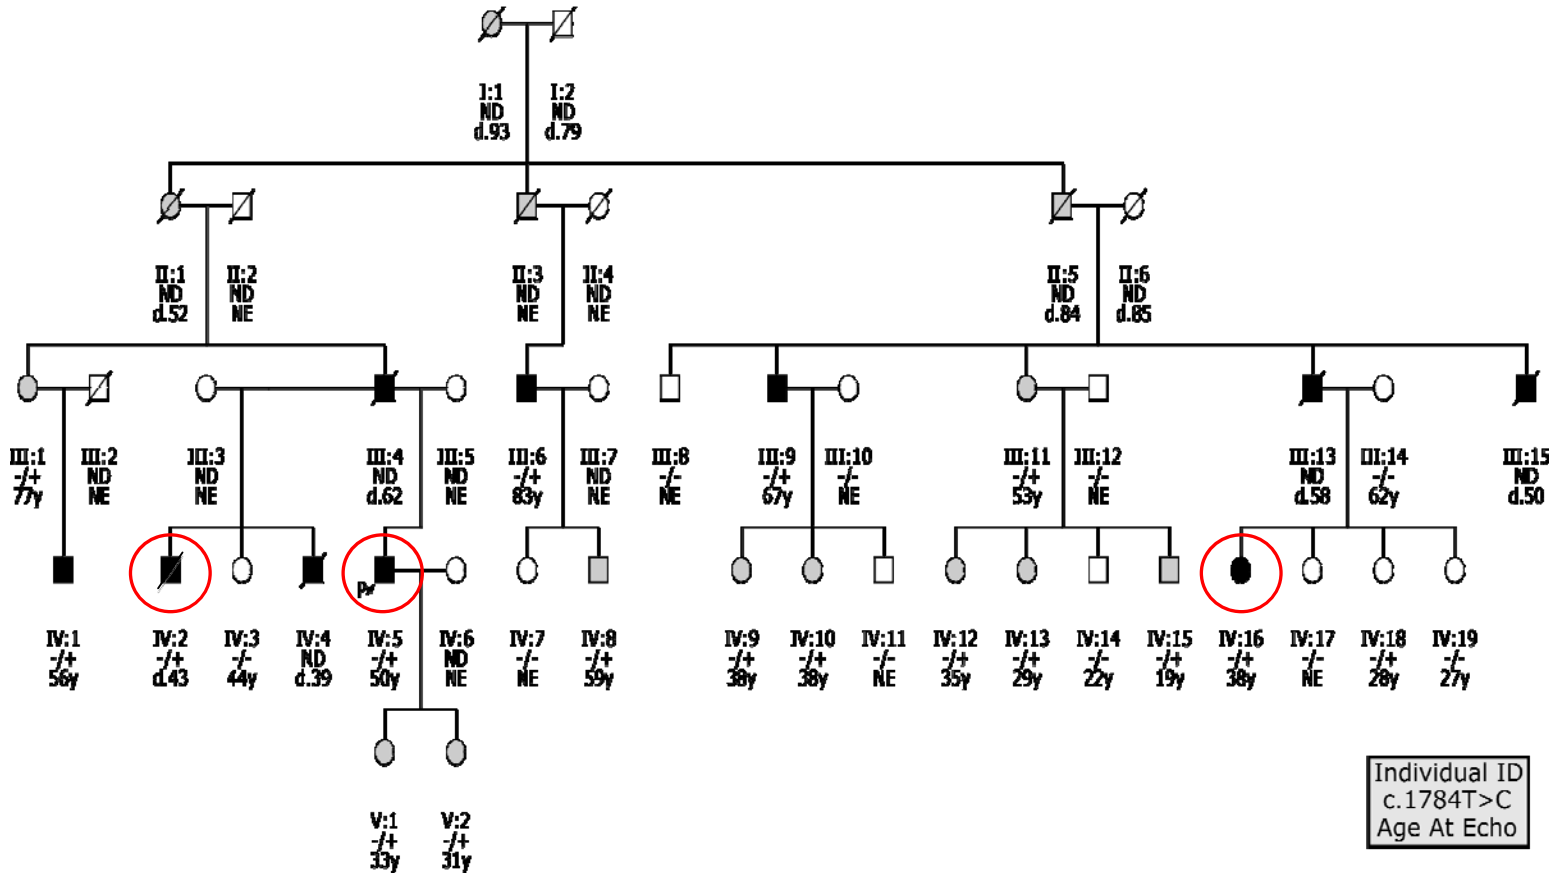

Figure 1. Family M441 pedigree showing affected individuals in black, ambiguous phenotype in grey and unaffected in white. The proband is indicated with a P with an arrow. Affected individuals, who have undergone exome sequencing, circled in red. Individuals carrying c.1784T>C allele (-/+); reference allele (-/-). ND- No DNA; NE- No echo; --y (e.g. 20y)- age when echo was taken (e.g. 20 years old); d.-- (e.g. d.39) age at death (e.g. death at age 39).

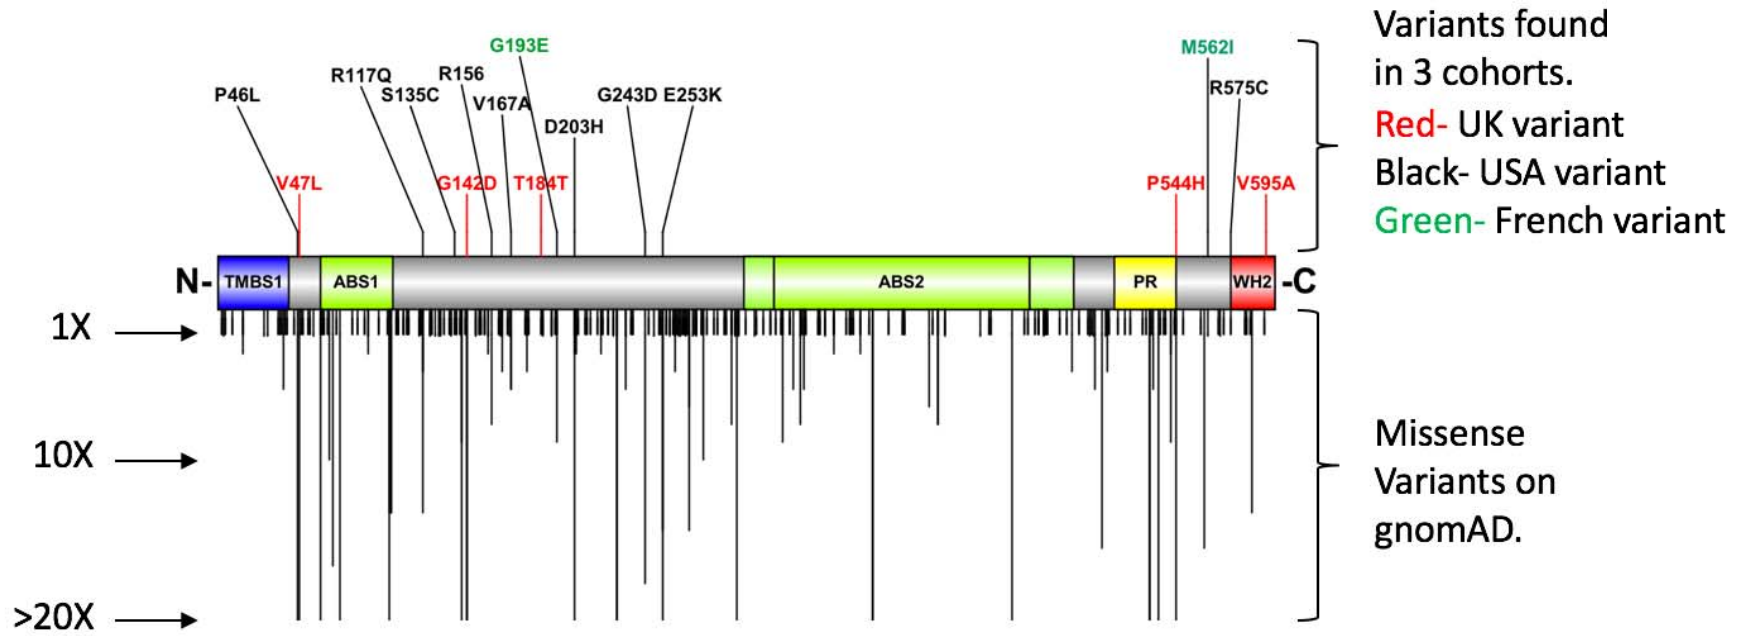

Figure 2. Diagram representing domain architecture of *LMOD1*. TMBS1- Tropomyosin binding site 1 (blue area). ABS1 and ABS2- Actin binding site 1 and 2 (green areas). PR- Proline rich region (yellow area) and WH2- Wiskott-Aldrich syndrome homology region 2 (red area). Adapted from Boczkowska et al, 2015<sup>63</sup>. Upward lines indicate alleles found in three cohorts (red variants from the UK cohort, black from the USA and green from French cohort). Downward lines indicate variants present on gnomAD, and the length indicates the number of times it has been reported from their database. Downward lines truncated from 20X.

| Cohort | Mutation<br>HGVS | Consequence<br>HGVS | CADD<br>score | phastCons<br>100 score | <i>In-silico</i><br>predictions | gnomAD<br>allele<br>frequency | Cosegregation<br>tested |
|--------|------------------|---------------------|---------------|------------------------|---------------------------------|-------------------------------|-------------------------|
| UK     | c.1631C>A        | p.(P544H)           | 25.8          | 1                      | +                               | 0.0003                        | Yes                     |
| UK     | c.1784T>C        | p.(V595A)           | 23.6          | 0.913                  | +                               | 0                             | Yes                     |
| USA    | c.137C>T         | p.(P46L)            | 23.4          | 1                      | +                               | 0.0003                        | N/A                     |
| USA    | c.350G>A         | p.(R117Q)           | 18.26         | 0                      | -                               | 0.00002                       | N/A                     |
| USA    | c.404C>G         | p.(S135C)           | 24.4          | 0.003                  | +                               | 0.00001                       | N/A                     |
| USA    | c.466C>T         | p.(R156W)           | 25.9          | 0.01                   | +                               | 0.00005                       | N/A                     |
| USA    | c.500T>C         | p.(V167A)           | 11.17         | 0.996                  | +                               | 0                             | N/A                     |
| USA    | c.607G>C         | p.(D203H)           | 23.6          | 0.008                  | +                               | 0.0001                        | N/A                     |
| USA    | c.728G>A         | p.(G243D)           | 0.102         | 0                      | +                               | 0.0002                        | N/A                     |
| USA    | c.757G>A         | p.(E253K)           | 8.519         | 0                      | -                               | 0.0001                        | N/A                     |
| USA    | c.1723C>T        | p.(R575C)           | 33            | 0.999                  | +                               | 0                             | N/A                     |
| FRANCE | c.578G>A         | p.(G193E)           | 0.016         | 0                      | +                               | 0.0002                        | N/A                     |
| FRANCE | c.1686G>A        | p.(M562I)           | 23.7          | 1                      | +                               | 0.000008                      | N/A                     |

Table 1. *In-silico* analysis of only the rare missense alleles detected in 98 UK, 800 USA and 403 French TAAD probands. The table includes columns for the cohort, mutation at nucleotide level, consequence on protein level (HGVS- Human Genome Variation Society nomenclature- NM\_012134), Combined Annotation-Dependent Depletion (CADD) score, PhastCons score, *In-silico* predictions (Polyphen-2, GVG, UMD-Predictor, SIFT and PROVEAN (+) - Damaging in two or more in-silico tools used (-) - Damaging in one or none of the in-silico tools used.), gnomAD allele frequency, cosegregation tested (N/A- No cosegregation performed). Rows highlighted in grey are predicted to be disease-causing mutations due to high CAAD scores (>20), PhastCons 100 score (>0.9) and damaging (+) upon in-silico predictions.

| Study group                                                                                | AS>HT | HP    | BS      | RE    | DSPF  | WF    | SJH       | HS    |
|--------------------------------------------------------------------------------------------|-------|-------|---------|-------|-------|-------|-----------|-------|
| Group A (Family M441 c.1784T>C carrier >18yrs)                                             | 12/18 | 12/18 | 6/18    | 2/18  | 3/18  | 6/18  | 9/18      | 9/18  |
| Group B (All TAAD probands)                                                                | 51/98 | 48/98 | 3/98    | 11/98 | 11/98 | 18/98 | 24/98     | 45/98 |
| Chi Square between group A (c.1784T>C carrier >18years) and group B (all TAAD probands) P= | 0.25  | 0.17  | 0.00001 | 0.43  | 0.51  | 0.15  | 0.0000003 | 0.7   |

Table 2. Phenotype correlation between group A- c.1784T>C affected status (n=18) with group B- all clinically diagnosed TAAD probands (n=98). AS>HT- Arm span greater than height, HP- High palate, BS- Blue sclera, RE- Redundant eyelids, DSPF- Downward-slanting palpebral fissures, WF- Wrinkled forehead, SJH- Small joint hypermobility and HS- Hyper extensible skin.



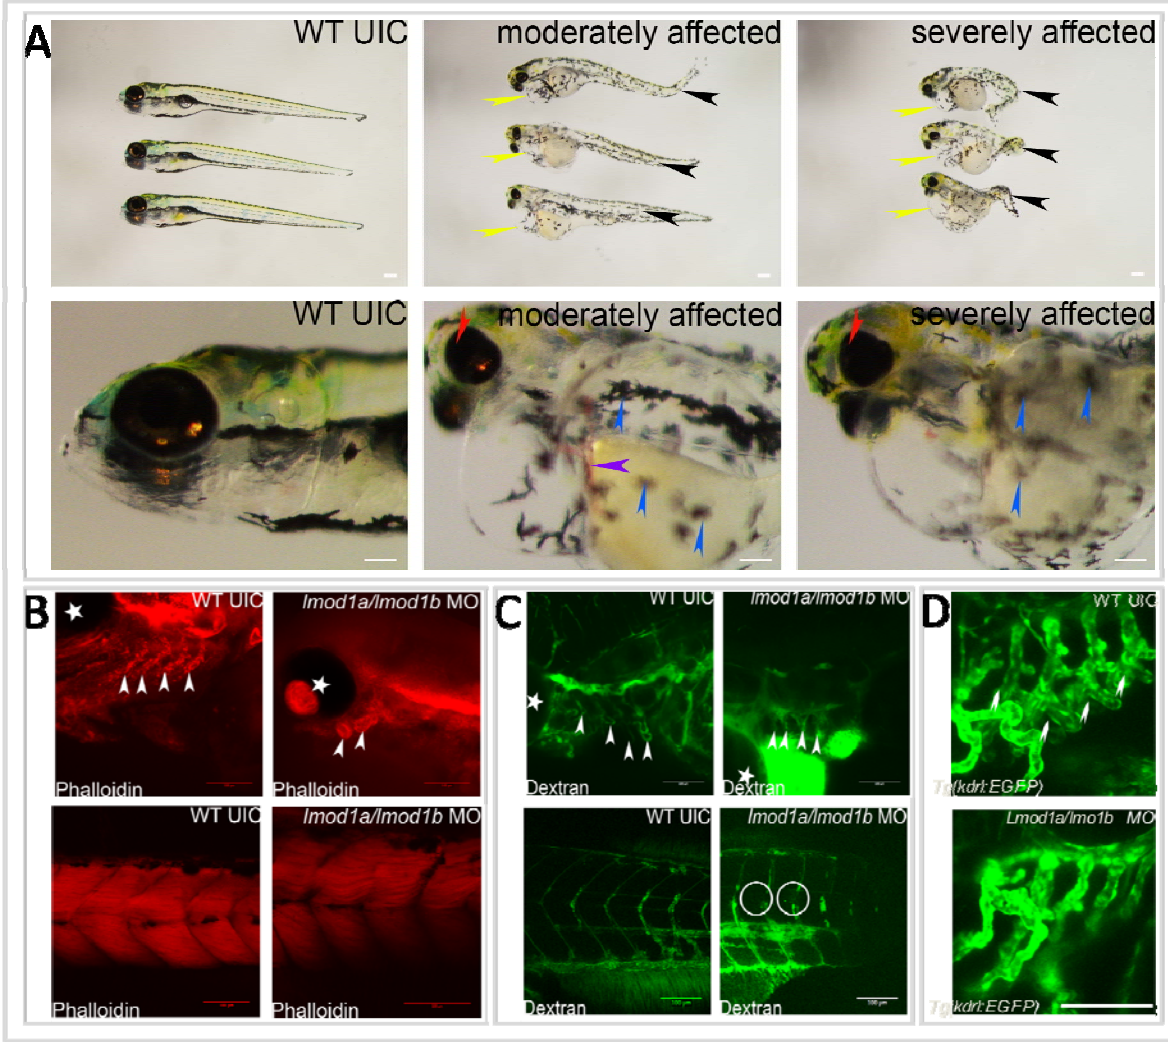

Figure 3. Microscopy of control and *lmod1a/lmo1b* MO fish. **A-** Phenotypic representation of un-injected wild-type zebrafish compared to moderately affected and severely affected *lmod1a/lmod1b* co-injected fish. Moderate to severe tail curvature (yellow arrows), pericardial edema (blue arrows), reduced eye size (green arrows) and abnormal distribution of melanocytes (white arrows), abnormal pooling of blood (red arrow) can be seen. **B-** Fluorescent microscopy of phalloidin stained Wild Type un-injected control (WT UIC) and *lmod1a/lmo1b* morpholino (MO) injected fish. Top left- WT UIC showing aortic arches (white arrows). Top right *lmod1a/lmo1b* MO injected fish showing aortic arches (white arrows). Bottom left- WT UIC fish showing normal muscle fibers in the tail. Bottom right- *lmod1a/lmo1b* MO injected fish showing crossing over of muscle fibers. **C-** Fluorescent microscopy of dextran injected WT UIC and *lmod1a/lmo1b* MO injected fish. Top left- WT UIC showing aortic arches (white arrows). Top right *lmod1a/lmo1b* MO injected fish showing aortic arches (white arrows). Bottom left- WT UIC fish showing normal vasculature in the tail. Bottom right- *lmod1a/lmo1b* MO injected fish showing absent flow towards the caudal half of the trunk, including fin vasculature. **D-** Confocal microscopy imaging of un-injected *kdr1: GFP* zebrafish compared with *lmod1a/lmod1b* MO injected *kdr1: GFP* fish. Normal branching of the pharyngeal arches can be seen in the un-injected wild-type fish but were disturbed/missing in the *lmod1a/lmod1b* MO injected *kdr1: GFP* fish (white arrows). Scale bar shown in the bottom right of images (100um length). \*- Marks the eye of the zebrafish.

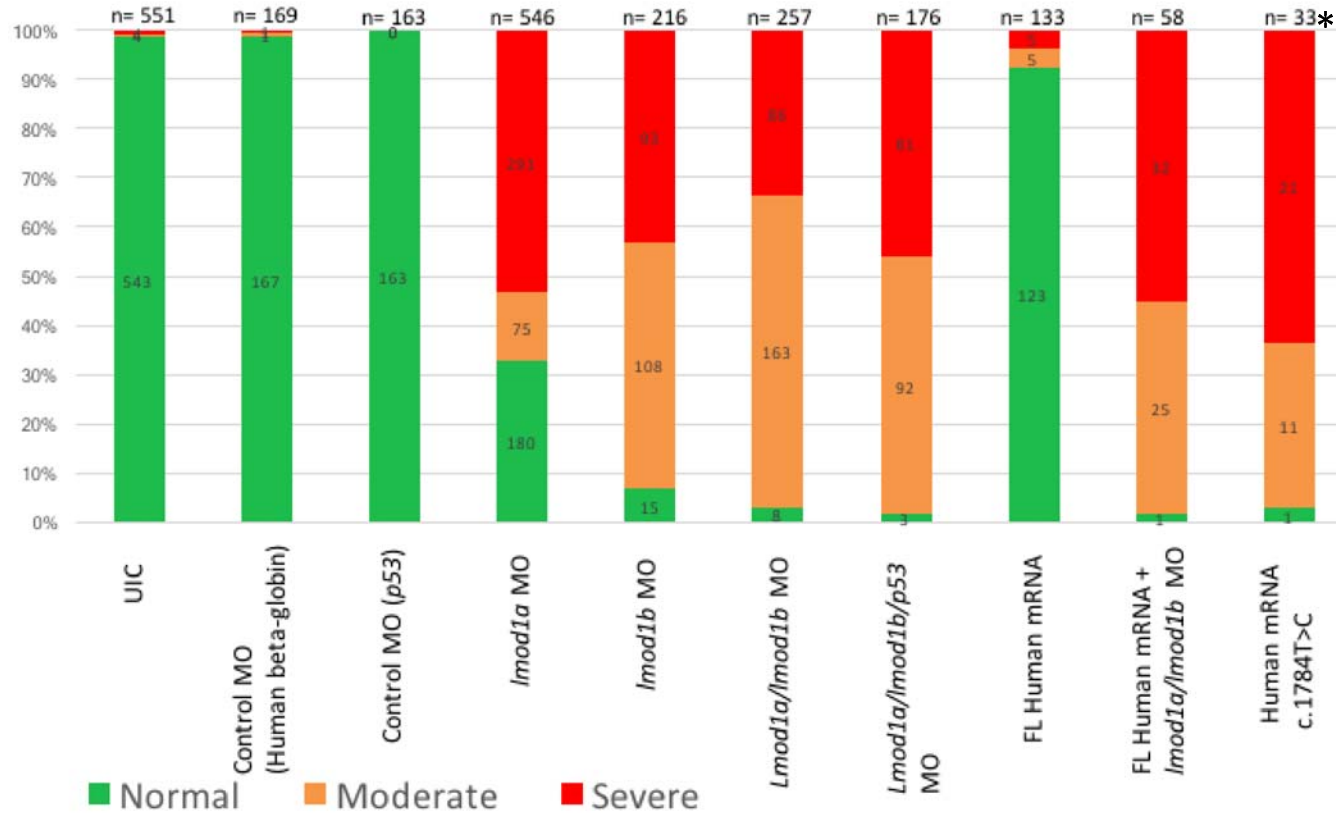

Figure 4. Bar chart showing normal (green), moderate (yellow) and severely affected (red) embryos associated with the following injections; Un-injected control (UIC); Human beta-globulin control MO (4ng/ul); p53 toxicity control MO (6ng/ul); *lmod1a* MO (4ng/ul); *lmod1b* MO at (4ng/ul); *lmod1a/lmod1b* MOs combined (4ng/ul; 2ng/ul + 2ng/ul); *lmod1a/lmod1b/p53* MOs combined (6ng/ul; 2ng/ul + 2ng/ul + 2ng/ul); Full length *LMOD1* Wild-type human mRNA (60ng/ul); Full length *LMOD1* Wild-type human mRNA (60ng/ul) and *lmod1a/lmod1b* (4ng/ul, 2ng/ul +2ng/ul); Human mutated *LMOD1* mRNA (c.1784T>C), \* A significant number of human mRNA c.1784T>C injected fish died by 24hpf compared to UIC.

## Acknowledgements

The authors would like to thank the families participating in this research study. This work was supported with grants from the British Heart Foundation to E.R.B, The Rosetrees Trust to Y.B.A.W. and A.C, The Marfan Trust, The Marfan association and The Everett Roseborough Legacy to Y.B.A.W, Peter and Sonia Field Charitable Trust to A.C, St George's Medical School and NHS Hospital Trust to A.C. and Guy's and St Thomas's charity to A.S. The zebrafish study was conducted in collaboration with Zebsolutions.

1. Heron, M., Hoyert, D.L., Murphy, S.L., Xu, J., Kochanek, K.D., and Tejada-Vera, B. (2009). Deaths: final data for 2006. *Natl Vital Stat Rep* 57, 1-134.
2. Milewicz, D.M., Carlson, A.A., and Regalado, E.S. (2010). Genetic testing in aortic aneurysm disease: PRO. *Cardiol Clin* 28, 191-197.
3. Albornoz, G., Coady, M.A., Roberts, M., Davies, R.R., Tranquilli, M., Rizzo, J.A., and Elefteriades, J.A. (2006). Familial thoracic aortic aneurysms and dissections--incidence, modes of inheritance, and phenotypic patterns. *Ann Thorac Surg* 82, 1400-1405.
4. Biddinger, A., Rocklin, M., Coselli, J., and Milewicz, D.M. (1997). Familial thoracic aortic dilatations and dissections: a case control study. *J Vasc Surg* 25, 506-511.
5. Coady, M.A., Davies, R.R., Roberts, M., Goldstein, L.J., Rogalski, M.J., Rizzo, J.A., Hammond, G.L., Kopf, G.S., and Elefteriades, J.A. (1999). Familial patterns of thoracic aortic aneurysms. *Arch Surg* 134, 361-367.
6. Pyeritz, R.E. (2014). Heritable thoracic aortic disorders. *Curr Opin Cardiol* 29, 97-102.
7. Guo, D.C., Pannu, H., Tran-Fadulu, V., Papke, C.L., Yu, R.K., Avidan, N., Bourgeois, S., Estrera, A.L., Safi, H.J., Sparks, E., et al. (2007). Mutations in smooth muscle alpha-actin (ACTA2) lead to thoracic aortic aneurysms and dissections. *Nat Genet* 39, 1488-1493.
8. Deak, S.B., Scholz, P.M., Amenta, P.S., Constantinou, C.D., Levi-Minzi, S.A., Gonzalez-Lavin, L., and Mackenzie, J.W. (1991). The substitution of arginine for glycine 85 of the alpha 1(I) procollagen chain results in mild osteogenesis imperfecta. The mutation provides direct evidence for three discrete domains of cooperative melting of intact type I collagen. *J Biol Chem* 266, 21827-21832.
9. Sasaki, T., Arai, K., Ono, M., Yamaguchi, T., Furuta, S., and Nagai, Y. (1987). Ehlers-Danlos syndrome. A variant characterized by the deficiency of pro alpha 2 chain of type I procollagen. *Arch Dermatol* 123, 76-79.
10. Nicholls, A.C., Valler, D., Wallis, S., and Pope, F.M. (2001). Homozygosity for a splice site mutation of the COL1A2 gene yields a non-functional pro(alpha)2(I) chain and an EDS/OI clinical phenotype. *J Med Genet* 38, 132-136.

11. Kuivaniemi, H., Kontusaari, S., Tromp, G., Zhao, M.J., Sabol, C., and Prockop, D.J. (1990). Identical G+1 to A mutations in three different introns of the type III procollagen gene (COL3A1) produce different patterns of RNA splicing in three variants of Ehlers-Danlos syndrome. IV. An explanation for exon skipping some mutations and not others. *J Biol Chem* 265, 12067-12074.
12. Ziganshin, B.A., Bailey, A.E., Coons, C., Dykas, D., Charilaou, P., Tanriverdi, L.H., Liu, L., Tranquilli, M., Bale, A.E., and Elefteriades, J.A. (2015). Routine Genetic Testing for Thoracic Aortic Aneurysm and Dissection in a Clinical Setting. *Ann Thorac Surg*.
13. Renard, M., Holm, T., Veith, R., Callewaert, B.L., Adès, L.C., Baspinar, O., Pickart, A., Dasouki, M., Hoyer, J., Rauch, A., et al. (2010). Altered TGFbeta signaling and cardiovascular manifestations in patients with autosomal recessive cutis laxa type I caused by fibulin-4 deficiency. *Eur J Hum Genet* 18, 895-901.
14. Szabo, Z., Crepeau, M.W., Mitchell, A.L., Stephan, M.J., Puntel, R.A., Yin Loke, K., Kirk, R.C., and Urban, Z. (2006). Aortic aneurysmal disease and cutis laxa caused by defects in the elastin gene. *J Med Genet* 43, 255-258.
15. Dietz, H.C., Pyeritz, R.E., Hall, B.D., Cadle, R.G., Hamosh, A., Schwartz, J., Meyers, D.A., and Francomano, C.A. (1991). The Marfan syndrome locus: confirmation of assignment to chromosome 15 and identification of tightly linked markers at 15q15-q21.3. *Genomics* 9, 355-361.
16. Dietz, H.C., Cutting, G.R., Pyeritz, R.E., Maslen, C.L., Sakai, L.Y., Corson, G.M., Puffenberger, E.G., Hamosh, A., Nanthakumar, E.J., and Curristin, S.M. (1991). Marfan syndrome caused by a recurrent de novo missense mutation in the fibrillin gene. *Nature* 352, 337-339.
17. Wang, M., Clericuzio, C.L., and Godfrey, M. (1996). Familial occurrence of typical and severe lethal congenital contractural arachnodactyly caused by missplicing of exon 34 of fibrillin-2. *Am J Hum Genet* 59, 1027-1034.
18. Sheen, V.L., Jansen, A., Chen, M.H., Parrini, E., Morgan, T., Ravenscroft, R., Ganesh, V., Underwood, T., Wiley, J., Leventer, R., et al. (2005). Filamin A mutations cause periventricular heterotopia with Ehlers-Danlos syndrome. *Neurology* 64, 254-262.
19. McElhinney, D.B., Krantz, I.D., Bason, L., Piccoli, D.A., Emerick, K.M., Spinner, N.B., and Goldmuntz, E. (2002). Analysis of cardiovascular phenotype and genotype-phenotype correlation in individuals with a JAG1 mutation and/or Alagille syndrome. *Circulation* 106, 2567-2574.
20. Guo, D.C., Gong, L., Regalado, E.S., Santos-Cortez, R.L., Zhao, R., Cai, B., Veeraraghavan, S., Prakash, S.K., Johnson, R.J., Muilenburg, A., et al. (2015). MAT2A Mutations Predispose Individuals to Thoracic Aortic Aneurysms. *Am J Hum Genet* 96, 170-177.
21. Pannu, H., Tran-Fadulu, V., Papke, C.L., Scherer, S., Liu, Y., Presley, C., Guo, D., Estrera, A.L., Safi, H.J., Brasier, A.R., et al. (2007). MYH11 mutations result in a distinct vascular pathology driven by insulin-like growth factor 1 and angiotensin II. *Hum Mol Genet* 16, 2453-2462.

22. Wang, L., Guo, D.C., Cao, J., Gong, L., Kamm, K.E., Regalado, E., Li, L., Shete, S., He, W.Q., Zhu, M.S., et al. (2010). Mutations in myosin light chain kinase cause familial aortic dissections. *Am J Hum Genet* 87, 701-707.
23. Stittrich, A.B., Lehman, A., Bodian, D.L., Ashworth, J., Zong, Z., Li, H., Lam, P., Khromykh, A., Iyer, R.K., Vockley, J.G., et al. (2014). Mutations in NOTCH1 cause Adams-Oliver syndrome. *Am J Hum Genet* 95, 275-284.
24. Guo, D.C., Regalado, E., Casteel, D.E., Santos-Cortez, R.L., Gong, L., Kim, J.J., Dyack, S., Horne, S.G., Chang, G., Jondeau, G., et al. (2013). Recurrent gain-of-function mutation in PRKG1 causes thoracic aortic aneurysms and acute aortic dissections. *Am J Hum Genet* 93, 398-404.
25. Doyle, A.J., Doyle, J.J., Bessling, S.L., Maragh, S., Lindsay, M.E., Schepers, D., Gillis, E., Mortier, G., Homfray, T., Sauls, K., et al. (2012). Mutations in the TGF- $\beta$  repressor SKI cause Shprintzen-Goldberg syndrome with aortic aneurysm. *Nat Genet* 44, 1249-1254.
26. Coucke, P.J., Willaert, A., Wessels, M.W., Callewaert, B., Zoppi, N., De Backer, J., Fox, J.E., Mancini, G.M., Kambouris, M., Gardella, R., et al. (2006). Mutations in the facilitative glucose transporter GLUT10 alter angiogenesis and cause arterial tortuosity syndrome. *Nat Genet* 38, 452-457.
27. Micha, D., Guo, D.C., Hilhorst-Hofstee, Y., van Kooten, F., Atmaja, D., Overwater, E., Cayami, F.K., Regalado, E.S., van Uffelen, R., Venselaar, H., et al. (2015). SMAD2 Mutations Are Associated with Arterial Aneurysms and Dissections. *Hum Mutat*.
28. van de Laar, I.M., Oldenburg, R.A., Pals, G., Roos-Hesselink, J.W., de Graaf, B.M., Verhagen, J.M., Hoedemaekers, Y.M., Willemsen, R., Severijnen, L.A., Venselaar, H., et al. (2011). Mutations in SMAD3 cause a syndromic form of aortic aneurysms and dissections with early-onset osteoarthritis. *Nat Genet* 43, 121-126.
29. Teekakirikul, P., Milewicz, D.M., Miller, D.T., Lacro, R.V., Regalado, E.S., Rosales, A.M., Ryan, D.P., Toler, T.L., and Lin, A.E. (2013). Thoracic aortic disease in two patients with juvenile polyposis syndrome and SMAD4 mutations. *Am J Med Genet A* 161A, 185-191.
30. Boileau, C., Guo, D.C., Hanna, N., Regalado, E.S., Detaint, D., Gong, L., Varret, M., Prakash, S.K., Li, A.H., d'Indy, H., et al. (2012). TGFB2 mutations cause familial thoracic aortic aneurysms and dissections associated with mild systemic features of Marfan syndrome. *Nat Genet* 44, 916-921.
31. Bertoli-Avella, A.M., Gillis, E., Morisaki, H., Verhagen, J.M., de Graaf, B.M., van de Beek, G., Gallo, E., Kruithof, B.P., Venselaar, H., Myers, L.A., et al. (2015). Mutations in a TGF- $\beta$  ligand, TGFB3, cause syndromic aortic aneurysms and dissections. *J Am Coll Cardiol* 65, 1324-1336.
32. Loeys, B.L., Schwarze, U., Holm, T., Callewaert, B.L., Thomas, G.H., Pannu, H., De Backer, J.F., Oswald, G.L., Symoens, S., Manouvrier, S., et al. (2006). Aneurysm syndromes caused by mutations in the TGF-beta receptor. *N Engl J Med* 355, 788-798.

33. Meester, J.A., Vandeweyer, G., Pintelon, I., Lammens, M., Van Hoorick, L., De Belder, S., Waitzman, K., Young, L., Markham, L.W., Vogt, J., et al. (2016). Loss-of-function mutations in the X-linked biglycan gene cause a severe syndromic form of thoracic aortic aneurysms and dissections. *Genet Med*.
34. Kuang, S.Q., Medina-Martinez, O., Guo, D.C., Gong, L., Regalado, E.S., Reynolds, C.L., Boileau, C., Jondeau, G., Prakash, S.K., Kwartler, C.S., et al. (2016). FOXE3 mutations predispose to thoracic aortic aneurysms and dissections. *J Clin Invest* 126, 948-961.
35. Liu, D., Wang, C.J., Judge, D.P., Halushka, M.K., Ni, J., Habashi, J.P., Moslehi, J., Bedja, D., Gabrielson, K.L., Xu, H., et al. (2014). A Pkd1-Fbn1 genetic interaction implicates TGF- $\beta$  signaling in the pathogenesis of vascular complications in autosomal dominant polycystic kidney disease. *J Am Soc Nephrol* 25, 81-91.
36. Wågsäter, D., Paloschi, V., Hanemaaijer, R., Hulthenby, K., Bank, R.A., Franco-Cereceda, A., Lindeman, J.H., and Eriksson, P. (2013). Impaired collagen biosynthesis and cross-linking in aorta of patients with bicuspid aortic valve. *J Am Heart Assoc* 2, e000034.
37. Guo, D.C., Grove, M.L., Prakash, S.K., Eriksson, P., Hostetler, E.M., LeMaire, S.A., Body, S.C., Shalhub, S., Estrera, A.L., Safi, H.J., et al. (2016). Genetic Variants in LRP1 and ULK4 Are Associated with Acute Aortic Dissections. *Am J Hum Genet* 99, 762-769.
38. Dietz, H.C. (2010). TGF-beta in the pathogenesis and prevention of disease: a matter of aneurysmic proportions. *J Clin Invest* 120, 403-407.
39. Adzhubei, I., Jordan, D.M., and Sunyaev, S.R. (2013). Predicting functional effect of human missense mutations using PolyPhen-2. *Curr Protoc Hum Genet* Chapter 7, Unit7.20.
40. Tavtigian, S.V., Deffenbaugh, A.M., Yin, L., Judkins, T., Scholl, T., Samollow, P.B., de Silva, D., Zharkikh, A., and Thomas, A. (2006). Comprehensive statistical study of 452 BRCA1 missense substitutions with classification of eight recurrent substitutions as neutral. *J Med Genet* 43, 295-305.
41. Salgado, D., Desvignes, J.P., Rai, G., Blanchard, A., Miltgen, M., Pinard, A., Lévy, N., Collod-Bérout, G., and Bérout, C. (2016). UMD-Predictor: A High-Throughput Sequencing Compliant System for Pathogenicity Prediction of any Human cDNA Substitution. *Hum Mutat* 37, 439-446.
42. Ng, P.C., and Henikoff, S. (2001). Predicting deleterious amino acid substitutions. *Genome Res* 11, 863-874.
43. Choi, Y., Sims, G.E., Murphy, S., Miller, J.R., and Chan, A.P. (2012). Predicting the functional effect of amino acid substitutions and indels. *PLoS One* 7, e46688.
44. Lek, M., Karczewski, K.J., Minikel, E.V., Samocha, K.E., Banks, E., Fennell, T., O'Donnell-Luria, A.H., Ware, J.S., Hill, A.J., Cummings, B.B., et al. (2016). Analysis of protein-coding genetic variation in 60,706 humans. *Nature* 536, 285-291.
45. Kircher, M., Witten, D.M., Jain, P., O'Roak, B.J., Cooper, G.M., and Shendure, J. (2014). A general framework for estimating the relative pathogenicity of human genetic variants. *Nat Genet* 46, 310-315.

46. Pollard, K.S., Hubisz, M.J., Rosenbloom, K.R., and Siepel, A. (2010). Detection of nonneutral substitution rates on mammalian phylogenies. *Genome Res* 20, 110-121.
47. Pundir, S., Martin, M.J., and O'Donovan, C. (2017). UniProt Protein Knowledgebase. *Methods Mol Biol* 1558, 41-55.
48. Consortium, G. (2015). Human genomics. The Genotype-Tissue Expression (GTEx) pilot analysis: multitissue gene regulation in humans. *Science* 348, 648-660.
49. Westerfield, M. (2007). *The Zebrafish Book. A Guide for the Laboratory Use of Zebrafish (Danio rerio)*, 5th Edition. (University of Oregon Press, Eugene).
50. Covassin, L.D., Siekmann, A.F., Kacergis, M.C., Laver, E., Moore, J.C., Villefranc, J.A., Weinstein, B.M., and Lawson, N.D. (2009). A genetic screen for vascular mutants in zebrafish reveals dynamic roles for Vegf/Plcg1 signaling during artery development. *Dev Biol* 329, 212-226.
51. Wittbrodt, J., and Meyer, A., M. (1998). **More genes in fish?** More genes in fish? In. (BioEssays.
52. Eisen, J.S., and Smith, J.C. (2008). Controlling morpholino experiments: don't stop making antisense. *Development* 135, 1735-1743.
53. Robu, M.E., Larson, J.D., Nasevicius, A., Beiraghi, S., Brenner, C., Farber, S.A., and Ekker, S.C. (2007). p53 activation by knockdown technologies. *PLoS Genet* 3, e78.
54. Loeys, B.L., Dietz, H.C., Braverman, A.C., Callewaert, B.L., De Backer, J., Devreux, R.B., Hilhorst-Hofstee, Y., Jondeau, G., Faivre, L., Milewicz, D.M., et al. (2010). The revised Ghent nosology for the Marfan syndrome. *J Med Genet* 47, 476-485.
55. Conley, C.A., Fritz-Six, K.L., Almenar-Queralt, A., and Fowler, V.M. (2001). Leiomodins: larger members of the tropomodulin (Tmod) gene family. *Genomics* 73, 127-139.
56. Consortium, G. (2013). The Genotype-Tissue Expression (GTEx) project. *Nat Genet* 45, 580-585.
57. Pappas, C.T., Mayfield, R.M., Henderson, C., Jamilpour, N., Cover, C., Hernandez, Z., Hutchinson, K.R., Chu, M., Nam, K.H., Valdez, J.M., et al. (2015). Knockout of Lmod2 results in shorter thin filaments followed by dilated cardiomyopathy and juvenile lethality. *Proc Natl Acad Sci U S A* 112, 13573-13578.
58. Yuen, M., Sandaradura, S.A., Dowling, J.J., Kostyukova, A.S., Moroz, N., Quinlan, K.G., Lehtokari, V.L., Ravenscroft, G., Todd, E.J., Ceyhan-Birsoy, O., et al. (2014). Leiomodins-3 dysfunction results in thin filament disorganization and nemaline myopathy. *J Clin Invest* 124, 4693-4708.
59. Cenik, B.K., Garg, A., McAnally, J.R., Shelton, J.M., Richardson, J.A., Bassel-Duby, R., Olson, E.N., and Liu, N. (2015). Severe myopathy in mice lacking the MEF2/SRF-dependent gene leiomodins-3. *J Clin Invest* 125, 1569-1578.
60. Tian, L., Ding, S., You, Y., Li, T.R., Liu, Y., Wu, X., Sun, L., and Xu, T. (2015). Leiomodins-3-deficient mice display nemaline myopathy with fast-myofiber atrophy. *Dis Model Mech* 8, 635-641.



61. Halim, D., Wilson, M.P., Oliver, D., Brosens, E., Verheij, J.B., Han, Y., Nanda, V., Lyu, Q., Doukas, M., Stoop, H., et al. (2017). Loss of LMOD1 impairs smooth muscle cytocontractility and causes megacystis microcolon intestinal hypoperistalsis syndrome in humans and mice. *Proc Natl Acad Sci U S A* 114, E2739-E2747.
62. Chereau, D., Boczkowska, M., Skwarek-Maruszewska, A., Fujiwara, I., Hayes, D.B., Rebowski, G., Lappalainen, P., Pollard, T.D., and Dominguez, R. (2008). Leiomodin is an actin filament nucleator in muscle cells. *Science* 320, 239-243.
63. Boczkowska, M., Rebowski, G., Kremneva, E., Lappalainen, P., and Dominguez, R. (2015). How Leiomodin and Tropomodulin use a common fold for different actin assembly functions. *Nat Commun* 6, 8314.
64. Hertzog, M., van Heijenoort, C., Didry, D., Gaudier, M., Coutant, J., Gigant, B., Didelot, G., Pr eat, T., Knossow, M., Guittet, E., et al. (2004). The beta-thymosin/WH2 domain; structural basis for the switch from inhibition to promotion of actin assembly. *Cell* 117, 611-623.
65. Zalevsky, J., Lempert, L., Kranitz, H., and Mullins, R.D. (2001). Different WASP family proteins stimulate different Arp2/3 complex-dependent actin-nucleating activities. *Curr Biol* 11, 1903-1913.
66. Venselaar, H., Te Beek, T.A., Kuipers, R.K., Hekkelman, M.L., and Vriend, G. (2010). Protein structure analysis of mutations causing inheritable diseases. An e-Science approach with life scientist friendly interfaces. *BMC Bioinformatics* 11, 548.
67. Lambrechts, A., Jonckheere, V., Dewitte, D., Vandekerckhove, J., and Ampe, C. (2002). Mutational analysis of human profilin I reveals a second PI(4,5)-P2 binding site neighbouring the poly(L-proline) binding site. *BMC Biochem* 3, 12.
68. Cheng, J., Randall, A., and Baldi, P. (2006). Prediction of protein stability changes for single-site mutations using support vector machines. *Proteins* 62, 1125-1132.
69. Urbanek, A.N., Smith, A.P., Allwood, E.G., Booth, W.I., and Ayscough, K.R. (2013). A novel actin-binding motif in Las17/WASP nucleates actin filaments independently of Arp2/3. *Curr Biol* 23, 196-203.
